# Supplementary material for: Cumulative exposure and dynamic trajectories of the C-reactive protein-triglyceride-glucose index versus the Cholesterol, high-density lipoprotein, and glucose index for incident hypertension prediction: a national cohort study
Source: Research Square preprint supplement (doi:10.21203/rs.3.rs-8819257/v1), 2026-02-13
Supplement: Supplementary file 1 [file dea571010ebd8788bc8ae315.docx]

| **Variables** | **VIF** |
| --- | --- |
| Age | 1.13 |
| Gender | 2.09 |
| BMI | 1.01 |
| Married | 1.03 |
| Smoking status | 1.67 |
| Drinking status | 1.31 |
| Education Level | 1.22 |
| Diabetes | 1.11 |
| Rural Residence | 1.06 |
| Heart Disease | 1.03 |
| Kidney Disease | 1.02 |
| Stroke | 1.01 |
| Cumulative CHG | 1.92 |
| Cumulative CTI | 1.81 |

**Table S1. VIF for variables included in the fully adjusted model.** VIF, variance inflation factor. VIF > 5 is considered potentially problematic.

**Table S2. Missingness of baseline variables.**

| **Variable** | **Missing (n)** | **Missing (%)** |
| --- | --- | --- |
| BMI, kg/m² | 360 | 12.85 |
| DBP, mmHg | 348 | 12.42 |
| Waist circumference, cm | 347 | 12.39 |
| SBP, mmHg | 347 | 12.39 |
| Current smoking | 48 | 1.71 |
| Diabetes | 43 | 1.54 |
| Heart disease | 33 | 1.18 |
| Kidney disease | 31 | 1.11 |
| Stroke | 23 | 0.82 |
| HbA1c, % | 21 | 0.75 |
| Current drinking | 12 | 0.43 |
| Marital status | 3 | 0.11 |
| LDL-C, mg/dL | 1 | 0.04 |
| Age, years | 0 | 0.00 |
| HDL-C, mg/dL | 0 | 0.00 |
| TC, mg/dL | 0 | 0.00 |
| TG, mg/dL | 0 | 0.00 |
| FPG, mg/dL | 0 | 0.00 |
| CRP, mg/L | 0 | 0.00 |
| Cumulative CTI | 0 | 0.00 |
| Cumulative CHG | 0 | 0.00 |
| Gender | 0 | 0.00 |
| Education | 0 | 0.00 |
| Residence | 0 | 0.00 |
